# Supplementary material
Source: PubMed Central journal article supplement (PMC6439744)
Supplement: jamapsychiatry-76-152-s001.pdf [file jamapsychiatry-76-152-s001.pdf]

## Supplementary Online Content

Olfson M, Wang S, Wall M, Marcus SC, Blanco C. Trends in serious psychological distress and outpatient mental health care of US adults. *JAMA Psychiatry*. Published online November 28, 2018. doi:10.1001/jamapsychiatry.2018.3550

**eTable 1.** Comparative Odds of Serious Psychological Distress Among Adults Stratified by Age, Sex, and Race/Ethnicity in 2004-05, 2009-10, and 2014-15, United States

**eTable 2.** Trends in Use of Any Outpatient Mental Health Service by Adults

**eTable 3.** Estimated Number of Adults in Millions Receiving Any Outpatient Mental Health Services by Serious Psychological Distress

**eTable 4.** Comparative Odds of Any Mental Health Service Use by Adults Stratified by Age, Sex, and Race/Ethnicity in 2004-05, 2009-10, and 2014-15, United States

This supplementary material has been provided by the authors to give readers additional information about their work.

| <b>eTable 1.</b> Comparative Odds of Serious Psychological Distress Among Adults Stratified by Age, Sex, and Race/Ethnicity in 2004-05, 2009-10, and 2014-15, United States |                        |                        |                        |
|-----------------------------------------------------------------------------------------------------------------------------------------------------------------------------|------------------------|------------------------|------------------------|
| <b>Serious Psychological Distress†</b>                                                                                                                                      | 2004-05<br>OR (95% CI) | 2009-10<br>OR (95% CI) | 2014-15<br>OR (95% CI) |
| <b>Age</b>                                                                                                                                                                  |                        |                        |                        |
| Ages 40-59 years (18-39 years reference)                                                                                                                                    | 1.43 (1.26, 1.62)      | 1.41 (1.25, 1.58)      | 1.44 (1.22, 1.70)      |
| Ages 60+ years (18-39 years reference)                                                                                                                                      | 1.35 (1.16, 1.56)      | 1.32 (1.13, 1.55)      | 1.24 (1.04, 1.49)      |
| <b>Sex</b>                                                                                                                                                                  |                        |                        |                        |
| Female (male reference)                                                                                                                                                     | 1.46 (1.29, 1.65)      | 1.30 (1.18, 1.44)      | 1.40 (1.24, 1.59)      |
| <b>Race/Ethnicity</b>                                                                                                                                                       |                        |                        |                        |
| African American (white reference)                                                                                                                                          | 1.14 (0.97, 1.34)      | 1.09 (0.96, 1.24)      | 0.95 (0.80, 1.13)      |
| Hispanic (white is reference)                                                                                                                                               | 1.36 (1.19, 1.56)      | 1.09 (0.94, 1.27)      | 0.93 (0.78, 1.11)      |
| Other (white is reference)                                                                                                                                                  | 1.16 (0.93, 1.46)      | 0.86 (0.67, 1.09)      | 0.85 (0.67, 1.08)      |
| Data from Medical Expenditure Panel Surveys. Analysis limited to ages 18+ years.                                                                                            |                        |                        |                        |
| †Serious psychological distress based on Kessler-6 score of $\geq 12$ .                                                                                                     |                        |                        |                        |
| *Odds ratios (OR) denote unadjusted odds of mental health service use in period of first listed demographic group in relation to reference group.                           |                        |                        |                        |

| <b>eTable 2. Trends in Use of Any Outpatient Mental Health Service by Adults</b> |                                                    |                                    |                                    |                                       |                                      |
|----------------------------------------------------------------------------------|----------------------------------------------------|------------------------------------|------------------------------------|---------------------------------------|--------------------------------------|
| <b>Variable</b>                                                                  | <b>Use of Any Outpatient Mental Health Service</b> |                                    |                                    | <b>Period Effect†<br/>OR (95% CI)</b> | <b>p-value for<br/>Interaction††</b> |
|                                                                                  | <b>2004-05<br/>% of<br/>adults</b>                 | <b>2009-10<br/>% of<br/>adults</b> | <b>2014-15<br/>% of<br/>adults</b> |                                       |                                      |
| <b>All adults</b>                                                                | 19.08                                              | 20.44                              | 23.00                              | 1.25 (1.17, 1.34)                     |                                      |
| 1. Serious psychological distress (K-6 ≥13)                                      | 54.17                                              | 58.63                              | 68.40                              | 1.84 (1.53, 2.23)                     | 1 vs 2: 0.02                         |
| 2. Less serious psychological distress (K-6=1 to 12)                             | 21.40                                              | 23.15                              | 28.57                              | 1.46 (1.36, 1.57)                     | 2 vs 3: 0.006                        |
| 3. No psychological distress (K-6=0)                                             | 9.72                                               | 9.77                               | 11.97                              | 1.24 (1.11, 1.38)                     | 1 vs 3: 0.0004                       |

Data from Medical Expenditure Panel Surveys and presented as annualized percentages.  
† Period effects represent the age and sex adjusted odds ratios (OR) of the outpatient mental health services in 2014-15 with 2004-05 as reference.  
†† Interaction *p*-values test whether changes in outpatient mental health service use over time differed across psychological distress strata.

| <b>eTable 3. Estimated Number of Adults in Millions Receiving Any Outpatient Mental Health Services by Serious Psychological Distress</b> |                                                           |                                                           |                                                           |
|-------------------------------------------------------------------------------------------------------------------------------------------|-----------------------------------------------------------|-----------------------------------------------------------|-----------------------------------------------------------|
| <b>Variable</b>                                                                                                                           | <b>Use of Any Outpatient Mental Health Service</b>        |                                                           |                                                           |
|                                                                                                                                           | 2004-05<br>estimated<br>millions<br>of<br>adults (95% CI) | 2009-10<br>estimated<br>millions<br>of<br>adults (95% CI) | 2014-15<br>estimated<br>millions<br>of<br>adults (95% CI) |
| <b>All adults</b>                                                                                                                         | 41.82 (38.97, 44.68)                                      | 47.09 (44.68, 49.49)                                      | 56.00 (52.77, 59.20)                                      |
| Serious psychological distress                                                                                                            | 5.59 (5.07, 6.11)                                         | 6.48 (5.92, 7.04)                                         | 5.96 (5.37, 6.55)                                         |
| Less serious or no serious psychological distress                                                                                         | 35.17 (32.64, 37.71)                                      | 39.07 (37.00, 41.14)                                      | 47.69 (44.80, 50.61)                                      |
| <b>Adults 18-39 years of age</b>                                                                                                          | 10.94 (9.83, 12.05)                                       | 12.66 (11.59, 13.72)                                      | 14.65 (13.30, 15.99)                                      |
| Serious psychological distress                                                                                                            | 1.37 (1.13, 1.60)                                         | 1.74 (1.49, 2.00)                                         | 1.71 (1.42, 2.00)                                         |
| Less serious or no psychological distress                                                                                                 | 9.44 (8.44, 10.44)                                        | 10.61 (9.68, 11.53)                                       | 12.61 (11.39, 13.83)                                      |
| <b>Adults 40-59 years of age</b>                                                                                                          | 18.26 (16.85, 19.68)                                      | 19.12 (17.96, 20.28)                                      | 20.49 (18.99, 21.98)                                      |
| Serious psychological distress                                                                                                            | 2.77 (2.44, 3.10)                                         | 2.87 (2.49, 3.25)                                         | 2.56 (2.22, 2.91)                                         |
| Less serious or no psychological distress                                                                                                 | 15.12 (13.88, 16.36)                                      | 15.69 (14.71, 16.67)                                      | 17.11 (15.79, 18.43)                                      |
| <b>Adults 60+ years of age</b>                                                                                                            | 12.62 (11.68, 13.56)                                      | 15.31 (14.29, 16.33)                                      | 20.86 (19.42, 22.30)                                      |
| Serious psychological distress                                                                                                            | 1.45 (1.23, 1.68)                                         | 1.87 (1.60, 2.14)                                         | 1.69 (1.43, 1.95)                                         |
| Less serious or no psychological distress                                                                                                 | 10.61 (9.80, 11.42)                                       | 12.77 (11.88, 13.67)                                      | 17.97 (16.65, 19.29)                                      |
| <b>Male adults</b>                                                                                                                        | 14.16 (13.02, 15.30)                                      | 16.88 (15.75, 18.01)                                      | 20.38 (19.04, 21.73)                                      |
| Serious psychological distress                                                                                                            | 1.96 (1.69, 2.23)                                         | 2.45 (2.12, 2.77)                                         | 2.12 (1.81, 2.43)                                         |
| Less serious or no psychological distress                                                                                                 | 11.91 (10.85, 12.97)                                      | 13.80 (12.81, 14.80)                                      | 17.31 (16.11, 18.52)                                      |
| <b>Female adults</b>                                                                                                                      | 27.66 (25.64, 29.67)                                      | 30.21 (28.58, 31.85)                                      | 35.61 (33.42, 37.80)                                      |
| Serious psychological distress                                                                                                            | 3.63 (3.22, 4.05)                                         | 4.03 (3.64, 4.43)                                         | 3.84 (3.42, 4.26)                                         |
| Less serious or no psychological distress                                                                                                 | 23.27 (21.52, 25.01)                                      | 25.26 (23.87, 26.66)                                      | 30.38 (28.42, 32.34)                                      |
| <b>White adults</b>                                                                                                                       | 34.37 (31.73, 37.01)                                      | 38.30 (36.00, 40.60)                                      | 44.23 (41.27, 47.19)                                      |
| Serious psychological distress                                                                                                            | 4.11 (3.66, 4.56)                                         | 4.84 (4.34, 5.35)                                         | 4.35 (3.82, 4.87)                                         |
| Less serious or no psychological distress                                                                                                 | 29.49 (27.14, 31.84)                                      | 32.33 (30.33, 34.34)                                      | 38.15 (35.49, 40.81)                                      |
| <b>Non-white adults</b>                                                                                                                   | 7.46 (6.79, 8.12)                                         | 8.79 (8.09, 9.50)                                         | 11.77 (10.82, 12.72)                                      |
| Serious psychological distress                                                                                                            | 1.48 (1.28, 1.68)                                         | 1.64 (1.39, 1.89)                                         | 1.61 (1.39, 1.84)                                         |
| Less serious or no psychological distress                                                                                                 | 5.68 (5.14, 6.23)                                         | 6.73 (6.19, 7.28)                                         | 9.54 (8.72, 10.36)                                        |

Data from Medical Expenditure Panel Surveys.

| <b>eTable 4. Comparative Odds of Any Mental Health Service Use by Adults Stratified by Age, Sex, and Race/Ethnicity in 2004-05, 2009-10, and 2014-15, United States</b>                                                          |                                |                                |                                |
|----------------------------------------------------------------------------------------------------------------------------------------------------------------------------------------------------------------------------------|--------------------------------|--------------------------------|--------------------------------|
| <b>Mental Health Service</b>                                                                                                                                                                                                     | <b>2004-05<br/>OR (95% CI)</b> | <b>2009-10<br/>OR (95% CI)</b> | <b>2014-15<br/>OR (95% CI)</b> |
| <b>Any mental health service</b>                                                                                                                                                                                                 |                                |                                |                                |
| Ages 40-59 years (18-39 years reference)                                                                                                                                                                                         | 2.02 (1.85, 2.21)              | 1.80 (1.66, 1.96)              | 1.71 (1.55, 1.88)              |
| Ages 60+ (18-39 years reference)                                                                                                                                                                                                 | 2.44 (2.21, 2.70)              | 2.30 (2.11, 2.51)              | 2.48 (2.24, 2.74)              |
| Female (male reference)                                                                                                                                                                                                          | 2.09 (1.93, 2.25)              | 1.92 (1.78, 2.07)              | 1.88 (1.76, 2.00)              |
| White (non-white reference)                                                                                                                                                                                                      | 2.32 (2.13, 2.52)              | 2.39 (2.21, 2.59)              | 2.54 (2.36, 2.74)              |
| <b>Psychotherapy</b>                                                                                                                                                                                                             |                                |                                |                                |
| Ages 40-59 years (18-39 years reference)                                                                                                                                                                                         | 1.38 (1.20, 1.59)              | 1.05 (0.90, 1.22)              | 1.06 (0.92, 1.21)              |
| Ages 60+ (18-39 years reference)                                                                                                                                                                                                 | 0.67 (0.54, 0.82)              | 0.55 (0.46, 0.66)              | 0.68 (0.56, 0.82)              |
| Female (male reference)                                                                                                                                                                                                          | 1.67 (1.48, 1.88)              | 1.44 (1.26, 1.65)              | 1.80 (1.62, 2.00)              |
| White (non-white reference)                                                                                                                                                                                                      | 1.70 (1.46, 1.98)              | 1.70 (1.48, 1.95)              | 1.85 (1.59, 2.14)              |
| <b>Any psychotropic medication</b>                                                                                                                                                                                               |                                |                                |                                |
| Ages 40-59 years (18-39 years reference)                                                                                                                                                                                         | 2.17 (1.98, 2.38)              | 1.95 (1.80, 2.13)              | 1.92 (1.74, 2.14)              |
| Ages 60+ (18-39 years reference)                                                                                                                                                                                                 | 2.74 (2.46, 3.05)              | 2.62 (2.39, 2.87)              | 2.85 (2.56, 3.17)              |
| Female (male reference)                                                                                                                                                                                                          | 2.15 (1.98, 2.33)              | 1.95 (1.81, 2.11)              | 1.90 (1.78, 2.03)              |
| White (non-white reference)                                                                                                                                                                                                      | 2.40 (2.19, 2.62)              | 2.48 (2.29, 2.69)              | 2.63 (2.44, 2.85)              |
| <b>Antidepressants</b>                                                                                                                                                                                                           |                                |                                |                                |
| Ages 40-59 years (18-39 years reference)                                                                                                                                                                                         | 2.10 (1.90, 2.32)              | 2.03 (1.83, 2.24)              | 2.06 (1.83, 2.32)              |
| Ages 60+ (18-39 years reference)                                                                                                                                                                                                 | 2.00 (1.77, 2.26)              | 2.24 (2.00, 2.51)              | 2.67 (2.37, 3.00)              |
| Female (male reference)                                                                                                                                                                                                          | 2.40 (2.19, 2.63)              | 2.33 (2.11, 2.56)              | 2.24 (2.05, 2.45)              |
| White (non-white reference)                                                                                                                                                                                                      | 2.66 (2.38, 2.96)              | 2.84 (2.56, 3.14)              | 3.04 (2.77, 3.33)              |
| <b>Anxiolytics/sedatives</b>                                                                                                                                                                                                     |                                |                                |                                |
| Ages 40-59 years (18-39 years reference)                                                                                                                                                                                         | 2.92 (2.51, 3.40)              | 2.21 (1.95, 2.52)              | 2.11 (1.84, 2.42)              |
| Ages 60+ (18-39 years reference)                                                                                                                                                                                                 | 4.35 (3.71, 5.10)              | 2.82 (2.44, 3.27)              | 3.13 (2.71, 3.62)              |
| Female (male reference)                                                                                                                                                                                                          | 1.87 (1.67, 2.09)              | 1.80 (1.63, 1.99)              | 1.72 (1.55, 1.91)              |
| White (non-white reference)                                                                                                                                                                                                      | 2.20 (1.94, 2.50)              | 2.26 (2.00, 2.55)              | 2.45 (2.18, 2.75)              |
| <b>Antipsychotics</b>                                                                                                                                                                                                            |                                |                                |                                |
| Ages 40-59 years (18-39 years reference)                                                                                                                                                                                         | 1.45 (1.14, 1.85)              | 1.20 (0.93, 1.55)              | 1.46 (1.16, 1.84)              |
| Ages 60+ (18-39 years reference)                                                                                                                                                                                                 | 1.15 (0.83, 1.60)              | 0.98 (0.73, 1.30)              | 1.22 (0.94, 1.59)              |
| Female (male reference)                                                                                                                                                                                                          | 1.43 (1.15, 1.77)              | 1.19 (0.92, 1.54)              | 1.46 (1.20, 1.78)              |
| White (non-white reference)                                                                                                                                                                                                      | 0.89 (0.69, 1.15)              | 1.20 (0.997, 1.45)             | 1.42 (1.18, 1.72)              |
| <b>Mood stabilizers</b>                                                                                                                                                                                                          |                                |                                |                                |
| Ages 40-59 years (18-39 years reference)                                                                                                                                                                                         | 2.38 (1.99, 2.84)              | 1.76 (1.45, 2.14)              | 2.23 (1.89, 2.64)              |
| Ages 60+ (18-39 years reference)                                                                                                                                                                                                 | 2.73 (2.17, 3.45)              | 2.32 (1.91, 2.83)              | 3.12 (2.55, 3.82)              |
| Female (male reference)                                                                                                                                                                                                          | 1.75 (1.48, 2.07)              | 1.63 (1.40, 1.90)              | 1.52 (1.34, 1.73)              |
| White (non-white reference)                                                                                                                                                                                                      | 1.75 (1.43, 2.13)              | 1.85 (1.57, 2.17)              | 1.85 (1.60, 2.15)              |
| <b>Stimulants</b>                                                                                                                                                                                                                |                                |                                |                                |
| Ages 40-59 years (18-39 years reference)                                                                                                                                                                                         | 1.23 (0.94, 1.60)              | 0.91 (0.73, 1.13)              | 0.73 (0.58, 0.92)              |
| Ages 60+ (18-39 years reference)                                                                                                                                                                                                 | 1.54 (1.16, 2.05)              | 1.07 (0.86, 1.33)              | 0.78 (0.63, 0.98)              |
| Female (male reference)                                                                                                                                                                                                          | 1.38 (1.15, 1.66)              | 1.10 (0.89, 1.36)              | 1.21 (1.01, 1.45)              |
| White (non-white reference)                                                                                                                                                                                                      | 1.54 (1.20, 1.98)              | 1.90 (1.57, 2.29)              | 1.93 (1.59, 2.33)              |
| Data from Medical Expenditure Panel Surveys. Analysis limited to ages 18+ years. Odds ratios (OR) denote unadjusted odds of mental health service use in period of first listed demographic group in relation to reference group |                                |                                |                                |
